# Supplementary material for: A novel chaperone-effector-immunity system identified in uropathogenic Escherichia coli UMN026
Source: PeerJ. 2024 May 20;12:e17336. doi: 10.7717/peerj.17336 (PMC11114119; doi:10.7717/peerj.17336)
Supplement: Supplemental Information 1 [file peerj-12-17336-s001.xlsx]

## Sheet: Hoja1
ID	Phylogenetic_group	Gender	Symptomatology	Infec_category	ECUMN_0231	ECUMN_0232	ECUMN_0233	vgrG
2113	B2	Woman	Symptomatic	Pyelonephritis	Positive	Negative	Negative	Positive
2123	B1	Men	Symptomatic	Pyelonephritis	Negative	Negative	Negative	Negative
2176	B2	Woman	Asymptomatic	Asymptomatic bacteriuria	Negative	Negative	Negative	Negative
2194	D	Woman	Asymptomatic	Asymptomatic bacteriuria	Negative	Negative	Negative	Negative
2198	F	Woman	Asymptomatic	Asymptomatic bacteriuria	Negative	Positive	Negative	Positive
2210	B2	Woman	Symptomatic	Pyelonephritis	Negative	Negative	Negative	Negative
2213	B2	Men	Asymptomatic	Asymptomatic bacteriuria	Negative	Negative	Positive	Negative
2249	B2	Woman	Symptomatic	Pyelonephritis	Negative	Negative	Negative	Negative
2254	B2	Woman	Asymptomatic	Asymptomatic bacteriuria	Negative	Negative	Positive	Positive
2296	CLADE	Woman	Symptomatic	Cystitis	Negative	Negative	Positive	Negative
2302	B2	Woman	Symptomatic	Pyelonephritis	Negative	Negative	Negative	Negative
2368	B2	Woman	Asymptomatic	Asymptomatic bacteriuria	Negative	Negative	Negative	Negative
2379	E	Woman	Symptomatic	Cystitis	Negative	Negative	Negative	Negative
2390	B1	Woman	Symptomatic	Cystitis	Negative	Negative	Negative	Negative
2396	B2	Woman	Asymptomatic	Asymptomatic bacteriuria	Negative	Negative	Negative	Positive
2477	F	Men	Symptomatic	Cystitis	Negative	Negative	Positive	Positive
2486	C	Woman	Asymptomatic	Asymptomatic bacteriuria	Negative	Negative	Negative	Positive
2490	B2	Woman	Symptomatic	Cystitis	Negative	Negative	Negative	Negative
2495	B2	Woman	Asymptomatic	Asymptomatic bacteriuria	Negative	Negative	Positive	Positive
2578	B1	Woman	Symptomatic	Pyelonephritis	Negative	Negative	Negative	Positive
3136	B2	Woman	Symptomatic	Pyelonephritis	Negative	Negative	Negative	Negative
3215	C	Woman	Symptomatic	Pyelonephritis	Negative	Negative	Negative	Negative
3238	B2	Woman	Asymptomatic	Asymptomatic bacteriuria	Negative	Negative	Negative	Positive
3332	B2	Men	Asymptomatic	Asymptomatic bacteriuria	Negative	Negative	Negative	Negative
4011	B2	Men	Symptomatic	Pyelonephritis	Negative	Negative	Negative	Negative
4012	A	Men	Asymptomatic	Asymptomatic bacteriuria	Positive	Positive	Positive	Positive
4013	D	Woman	Asymptomatic	Asymptomatic bacteriuria	Negative	Positive	Negative	Negative
4014	B2	Men	Asymptomatic	Asymptomatic bacteriuria	Negative	Negative	Negative	Negative
4015	B2	Woman	Symptomatic	Cystitis	Negative	Negative	Negative	Negative
4016	A	Woman	Symptomatic	Pyelonephritis	Negative	Negative	Negative	Negative
4017	B1	Woman	Asymptomatic	Asymptomatic bacteriuria	Negative	Negative	Negative	Negative
4018	A	Woman	Asymptomatic	Asymptomatic bacteriuria	Negative	Negative	Negative	Negative
4019	B2	Woman	Symptomatic	Pyelonephritis	Negative	Negative	Negative	Negative
4020	B2	Woman	Asymptomatic	Asymptomatic bacteriuria	Positive	Negative	Negative	Positive
4021	B2	Woman	Asymptomatic	Asymptomatic bacteriuria	Negative	Negative	Negative	Negative
4022	A	Woman	Symptomatic	Cystitis	Negative	Negative	Negative	Negative
4023	B2	Men	Asymptomatic	Asymptomatic bacteriuria	Negative	Negative	Negative	Negative
4024	B2	Woman	Asymptomatic	Asymptomatic bacteriuria	Negative	Negative	Negative	Negative
4025	B1	Woman	Asymptomatic	Asymptomatic bacteriuria	Negative	Negative	Negative	Negative
4026	B2	Woman	Symptomatic	Pyelonephritis	Negative	Negative	Negative	Negative
4027	A	Men	Asymptomatic	Asymptomatic bacteriuria	Negative	Negative	Negative	Negative
4028	B2	Woman	Asymptomatic	Asymptomatic bacteriuria	Negative	Negative	Negative	Positive
4029	B2	Woman	Symptomatic	Cystitis	Negative	Negative	Negative	Negative
4030	A	Men	Asymptomatic	Asymptomatic bacteriuria	Negative	Negative	Negative	Negative
4031	B2	Woman	Asymptomatic	Asymptomatic bacteriuria	Negative	Negative	Negative	Negative
4032	B1	Woman	Asymptomatic	Asymptomatic bacteriuria	Negative	Negative	Negative	Negative
4033	B2	Woman	Symptomatic	Cystitis	Negative	Negative	Negative	Negative
4034	B2	Men	Asymptomatic	Asymptomatic bacteriuria	Negative	Negative	Negative	Negative
4035	B2	Men	Asymptomatic	Asymptomatic bacteriuria	Positive	Negative	Negative	Negative
4036	B2	Men	Symptomatic	Cystitis	Negative	Negative	Negative	Positive
4037	B2	Men	Asymptomatic	Asymptomatic bacteriuria	Positive	Negative	Negative	Positive
4038	B2	Men	Asymptomatic	Asymptomatic bacteriuria	Negative	Negative	Negative	Negative
4039	D	Woman	Asymptomatic	Asymptomatic bacteriuria	Positive	Positive	Positive	Positive
4040	B2	Woman	Symptomatic	Cystitis	Negative	Negative	Negative	Negative
4041	B2	Woman	Asymptomatic	Asymptomatic bacteriuria	Positive	Negative	Negative	Positive
4042	B2	Woman	Symptomatic	Cystitis	Negative	Negative	Negative	Negative
4043	B2	Woman	Asymptomatic	Asymptomatic bacteriuria	Negative	Negative	Negative	Negative
4044	B1	Men	Asymptomatic	Asymptomatic bacteriuria	Negative	Negative	Negative	Negative
4045	A	Woman	Asymptomatic	Asymptomatic bacteriuria	Negative	Negative	Negative	Negative
4046	A	Men	Asymptomatic	Asymptomatic bacteriuria	Negative	Negative	Negative	Negative
4048	B2	Woman	Asymptomatic	Asymptomatic bacteriuria	Positive	Negative	Positive	Positive
4049	D	Woman	Symptomatic	Cystitis	Negative	Negative	Positive	Negative
4050	B2	Men	Symptomatic	Pyelonephritis	Positive	Negative	Positive	Negative
4051	C	Woman	Asymptomatic	Asymptomatic bacteriuria	Positive	Negative	Negative	Positive
4052	B1	Woman	Asymptomatic	Asymptomatic bacteriuria	Positive	Negative	Negative	Positive
4054	B2	Woman	Asymptomatic	Asymptomatic bacteriuria	Positive	Negative	Negative	Positive
4055	B1	Woman	Asymptomatic	Asymptomatic bacteriuria	Positive	Negative	Negative	Positive
4056	A	Woman	Symptomatic	Cystitis	Negative	Negative	Negative	Positive
4057	B2	Woman	Symptomatic	Cystitis	Negative	Negative	Negative	Positive
4058	B2	Men	Symptomatic	Cystitis	Negative	Negative	Negative	Positive
4059	B1	Woman	Symptomatic	Cystitis	Negative	Negative	Negative	Positive
4060	A	Woman	Symptomatic	Cystitis	Negative	Negative	Negative	Positive
4061	A	Woman	Asymptomatic	Asymptomatic bacteriuria	Negative	Negative	Negative	Positive
4062	B2	Woman	Symptomatic	Cystitis	Negative	Negative	Negative	Negative
4063	D	Men	Asymptomatic	Asymptomatic bacteriuria	Positive	Negative	Negative	Positive
4064	CLADE	Woman	Asymptomatic	Asymptomatic bacteriuria	Negative	Negative	Negative	Positive
4065	A	Woman	Asymptomatic	Asymptomatic bacteriuria	Negative	Negative	Negative	Positive
4066	B2	Woman	Symptomatic	Pyelonephritis	Negative	Negative	Negative	Positive
4067	D	Woman	Symptomatic	Pyelonephritis	Negative	Negative	Negative	Positive
4068	B1	Woman	Symptomatic	Cystitis	Negative	Negative	Negative	Positive
4069	A	Woman	Asymptomatic	Asymptomatic bacteriuria	Negative	Negative	Negative	Positive
4070	A	Woman	Symptomatic	Cystitis	Negative	Negative	Negative	Negative
4071	B2	Woman	Asymptomatic	Asymptomatic bacteriuria	Negative	Negative	Negative	Positive
4072	B2	Woman	Symptomatic	Cystitis	Negative	Negative	Negative	Positive
4073	D	Woman	Symptomatic	Pyelonephritis	Positive	Positive	Positive	Positive
4074	D	Men	Symptomatic	Pyelonephritis	Negative	Negative	Negative	Positive
4075	B2	Woman	Asymptomatic	Asymptomatic bacteriuria	Negative	Negative	Negative	Positive
4076	B2	Woman	Asymptomatic	Asymptomatic bacteriuria	Negative	Negative	Negative	Negative
4077	B2	Woman	Symptomatic	Cystitis	Positive	Negative	Negative	Positive
4078	B2	Woman	Asymptomatic	Asymptomatic bacteriuria	Negative	Positive	Positive	Positive
4079	D	Woman	Symptomatic	Pyelonephritis	Positive	Positive	Positive	Positive
4080	E	Woman	Symptomatic	Cystitis	Negative	Negative	Negative	Positive
4081	B2	Woman	Symptomatic	Cystitis	Positive	Negative	Negative	Positive
4082	D	Woman	Asymptomatic	Asymptomatic bacteriuria	Negative	Positive	Positive	Positive
4083	B2	Men	Asymptomatic	Asymptomatic bacteriuria	Negative	Negative	Positive	Positive
4084	F	Men	Asymptomatic	Asymptomatic bacteriuria	Negative	Negative	Positive	Positive
4085	A	Woman	Asymptomatic	Asymptomatic bacteriuria	Negative	Negative	Positive	Negative
4086	D	Woman	Symptomatic	Pyelonephritis	Negative	Negative	Positive	Negative
4087	CLADE	Woman	Symptomatic	Pyelonephritis	Positive	Positive	Positive	Positive
