# Supplementary material for: A novel chaperone-effector-immunity system identified in uropathogenic Escherichia coli UMN026
Source: PeerJ. 2024 May 20;12:e17336. doi: 10.7717/peerj.17336 (PMC11114119; doi:10.7717/peerj.17336)
Supplement: Supplemental Information 3 — These data were used for statistical analysis to determine the relation between ECUMN and vgrG genes and symptomatology. [file peerj-12-17336-s003.xlsx]

## Sheet: Hoja1
LB broth
		1st assay		2nd assay		3rd assay
isolate	dilution	UMN026	4018	UMN026	4018	UMN026	4018
4014	10^-4	1.6744	1.6796	1.7459	1.7045	1.5196	1.4716
	10^-5	1.1835	1.5464	0.9955	1.5186	0.9541	1.3722
	10^-6	0.4606	0.6284	0.4866	0.5344	0.3391	0.6116
Urine
		1st assay		2nd assay		3rd assay
isolate	dilution	UMN026	4018	UMN026	4018	UMN026	4018
4014	10^-4	1.1718	1.4497	1.1389	1.2834	1.1528	1.3679
	10^-5	0.6582	1.2439	0.7045	0.844	0.6803	1.0441
	10^-6	0.0451	0.5653	0.0808	0.411	0.0121	0.3377
LB
		1st assay		2nd assay		3rd assay
strain	dilution	UMN026	4018	UMN026	4018	UMN026	4018
E. faecalis	10^-3	1.9845	1.9691	1.6336	1.8117	1.861	1.9731
	10^-4	1.6318	1.5208	1.5798	1.7261	1.4417	1.9064
	10^-5	0.7333	1.5507	0.6904	1.6996	0.6463	1.4027
	10^-6	0.6812	0.7447	0.6563	1.2018	0.6695	0.2855
Urine
		1st assay		2nd assay		3rd assay
strain	dilution	UMN026	4018	UMN026	4018	UMN026	4018
E. faecalis	10^-1	1.4991	1.4098	1.6207	1.7005	1.7432	1.9927
	10^-2	0.2011	1.0785	0.5258	1.4731	0.8481	1.8704
	10^-3	0.101	0.5184	0.0911	1.0391	0.1112	1.5595
	10^-4	0.0011	0.312	0.0023	0.2332	0.0091	0.4346
